# Supplementary material for: Modular approach towards multi-functional surfaces with adjustable and dual-responsive wettability using a hybrid polymer toolbox
Source: Royal Society of Chemistry journal article supplement (doi:10.1039/b913753j), 2009-01-01
Supplement: b913753j.pdf [file b913753j.pdf]

## Supplementary Information

### Modular Approach toward Multi-Functional Surfaces with Adjustable and Dual-Responsive Wettability Using a Hybrid Polymer Toolbox

*Daniel Kessler, Katja Nilles, Patrick Theato\**

Institute of Organic Chemistry, Johannes Gutenberg University Mainz, Duesbergweg 10-14, 55099 Mainz, Germany

Tel: 49 6131 3926256; Fax: 49 6131 3924778, Email: theato@uni-mainz.de

**Figure S1.**

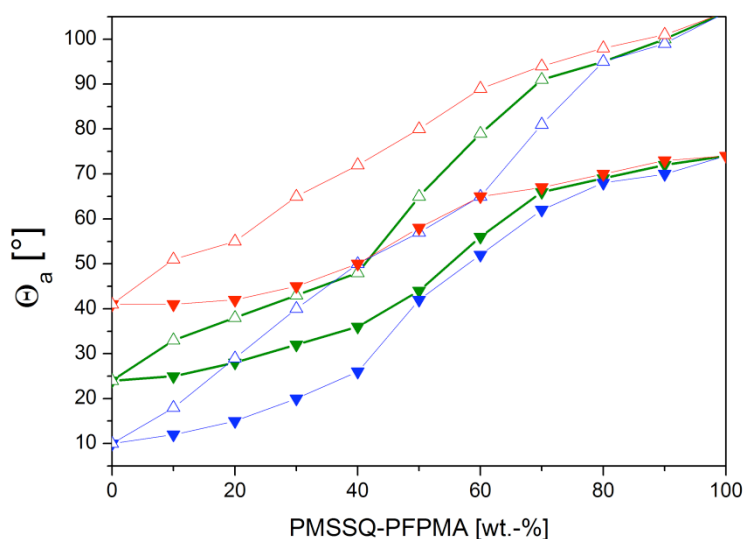

**Figure S1.** Different mixtures of PMSSQ-PFPMA ( $R_A$ ) and PMSSQ-PPVB ( $R_C$ ) were spin-coated onto Si, after conversion with (1) 4-benzoic acid methyl azide and (2) isopropylamine, the advancing contact angles were measured at different temperatures (filled symbols:  $T = 15\text{ }^{\circ}\text{C}$ , free symbols:  $T = 60\text{ }^{\circ}\text{C}$ ). Green lines measured at  $\text{pH} = 7$ , red lines measured at  $\text{pH} = 2$ , blue lines measured at  $\text{pH} = 11$ .

**Figure S2.**

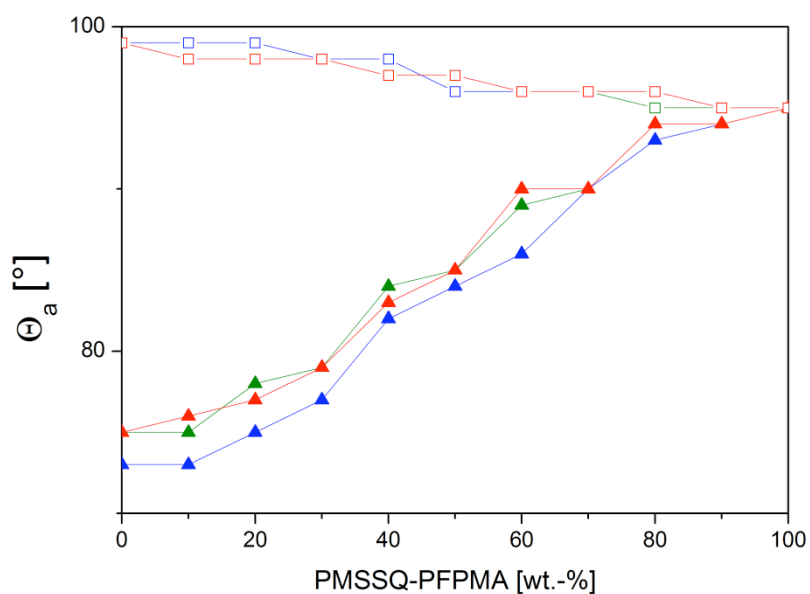

**Figure S2.** Advancing contact angles of water on silicon surfaces after applying different mixtures of two reactive coating materials. Upper graphs: Mixtures of PMSSQ-PFPVB and PMSSQ-PFPMA (wt.-% PMSSQ-PFPMA between 0% and 100%), green: pH = 7; red: pH = 2; blue: pH = 11. Lower graphs: Mixtures of PMSSQ-PPVB and PMSSQ-PFPMA, green: pH = 7; red: pH = 2; blue: pH = 11.

**Figure S3.**

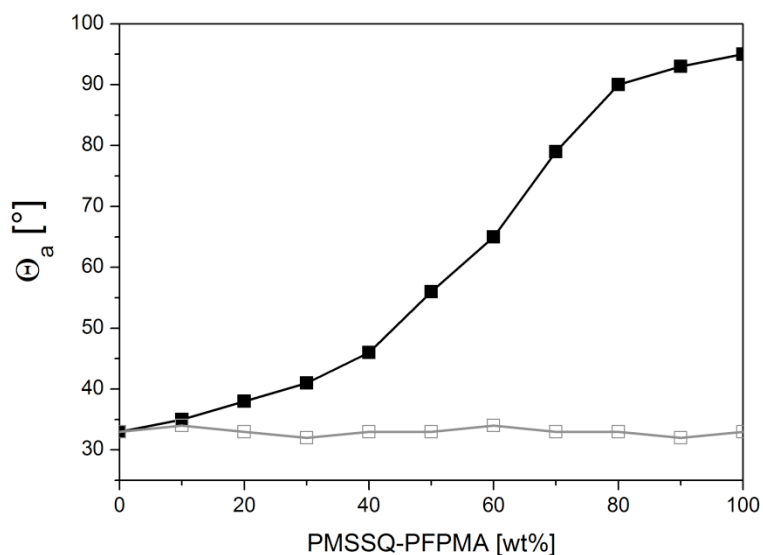

**Figure S3.** A series of mixtures of PMSSQ-PFPMA and PMSSQ-PPVB were spin coated on silicon wafers. First the cycloaddition with PEG-azide was performed and the contact angle was measured (black line), afterwards the dual-reactive surface was converted with PEG-amine yielding a complete PEGylated surface (grey line).

**Figure S4.**

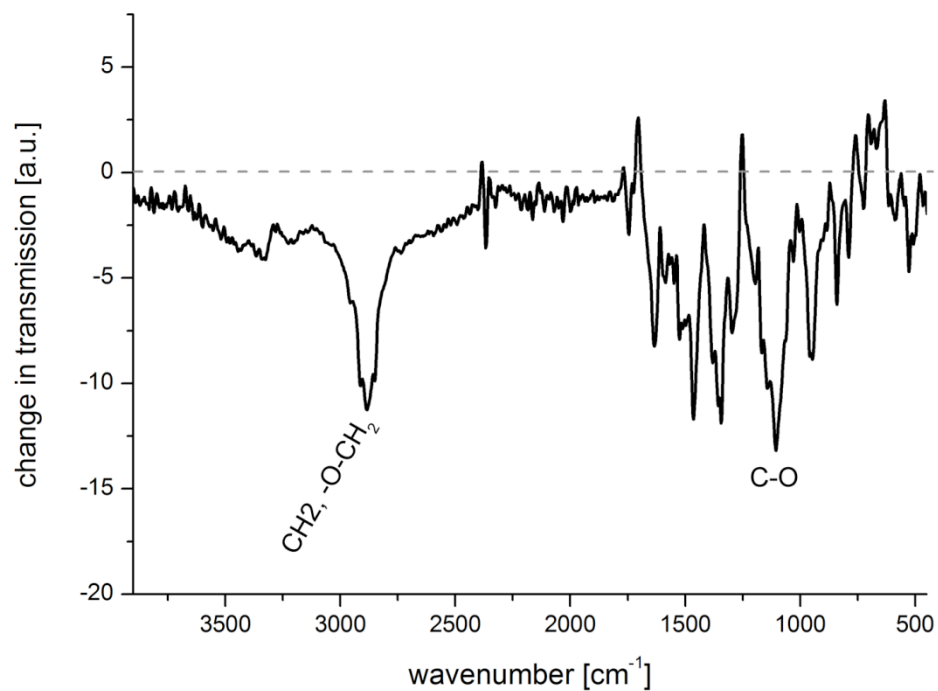

**Figure S4.** Spectrum 4 subtracted from spectrum 3. New bands appear below the zero line, vanished bands appear above.

**Figure S5.**

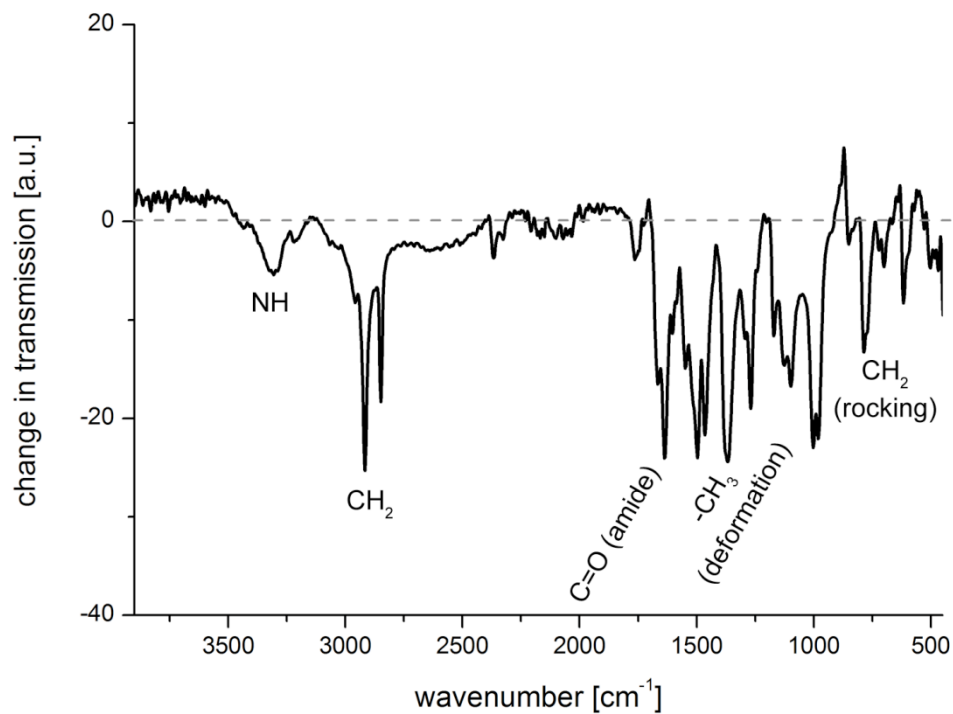

**Figure S5.** Spectrum 5 subtracted from spectrum 3. New bands appear below the zero line, vanished bands appear above.

**Table S1.** Obtained advancing and receding contact angles on a triple reactive surface with respect to the functionalization of  $R_C$  ( $R_A$  functionalized with isopropylamine,  $R_B$  functionalized with p-amino benzoic acid).

| Function at $R_C$ |       |       | $\Theta_a$ [°] | $\Theta_r$ [°] |
|-------------------|-------|-------|----------------|----------------|
| PEG               | pH 2  | 15 °C | 35             | 31             |
|                   |       | 60 °C | 54             | 51             |
|                   | pH 7  | 15 °C | 33             | 29             |
|                   |       | 60 °C | 52             | 50             |
|                   | pH 11 | 15 °C | 29             | 14             |
|                   |       | 60 °C | 47             | 32             |
| acetylene         | pH 2  | 15 °C | 61             | 58             |
|                   |       | 60 °C | 92             | 88             |
|                   | pH 7  | 15 °C | 59             | 55             |
|                   |       | 60 °C | 91             | 84             |
|                   | pH 11 | 15 °C | 53             | 34             |
|                   |       | 60 °C | 87             | 59             |
| Stearic acid      | pH 2  | 15 °C | 103            | 99             |
|                   |       | 60 °C | 115            | 106            |
|                   | pH 7  | 15 °C | 99             | 94             |
|                   |       | 60 °C | 110            | 100            |
|                   | pH 11 | 15 °C | 73             | 39             |
|                   |       | 60 °C | 100            | 64             |
